# Supplementary material
Source: PubMed Central journal article supplement (PMC9008875)
Supplement: NIHMS1791235-supplement-Figures.pdf [file NIHMS1791235-supplement-Figures.pdf]

**A**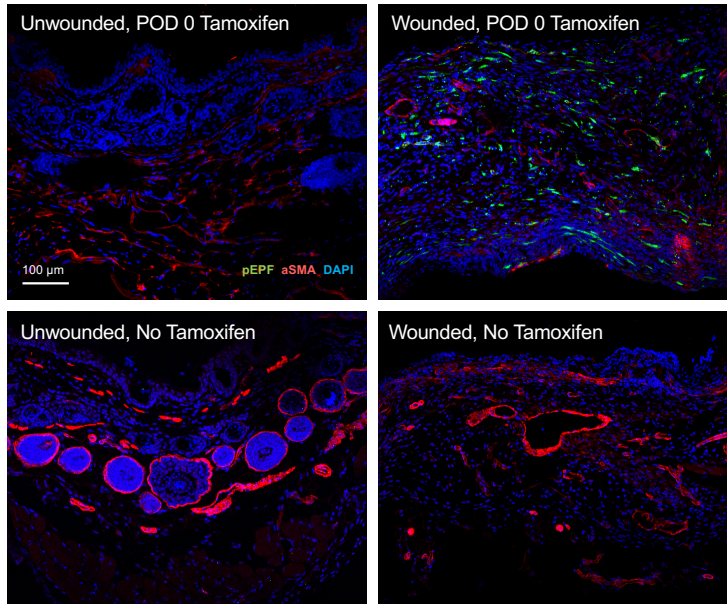**B**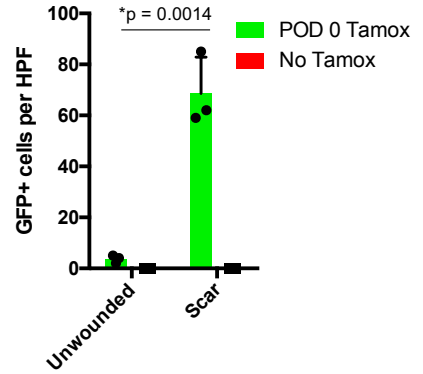

**Figure S1: Tamoxifen dosing controls.** (A) Immunofluorescent histology of unwounded skin and scars in *En-1<sup>Cre-ERT</sup>;Ai6* mice that received tamoxifen at the time of wounding (top row) or no tamoxifen (bottom row). (B) Quantification of GFP+ cells (pEPFs) per 20x HPF. Unwounded vs. scar, POD 0 tamoxifen  $*P = 0.0014$ ; no tamoxifen control not significant.

**A**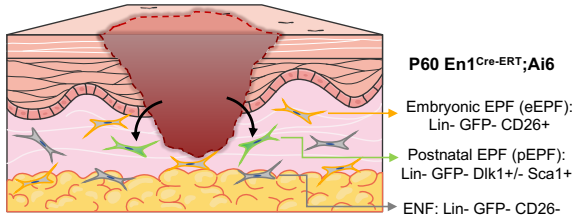**C**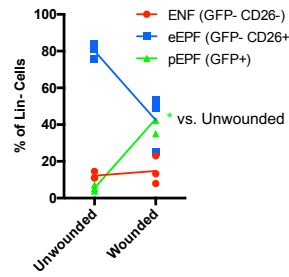**B**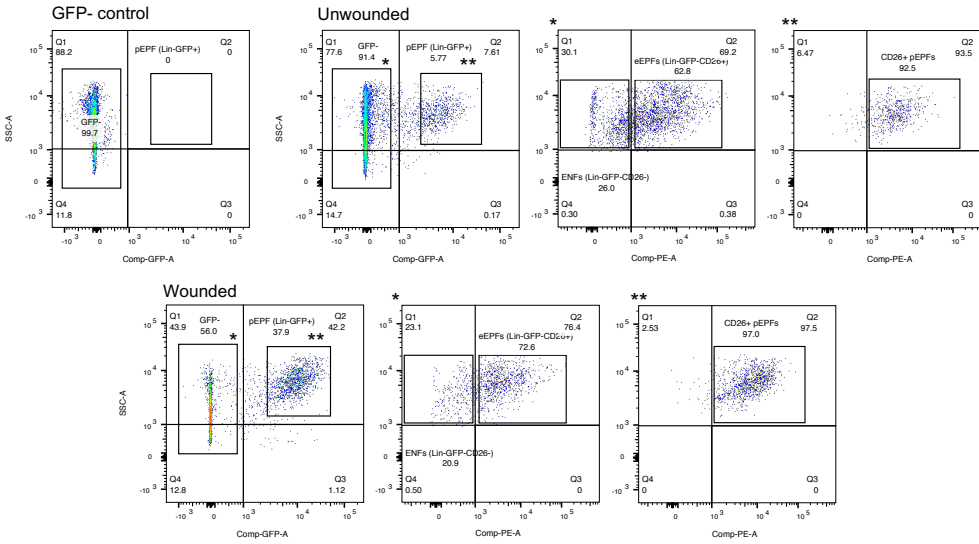**D**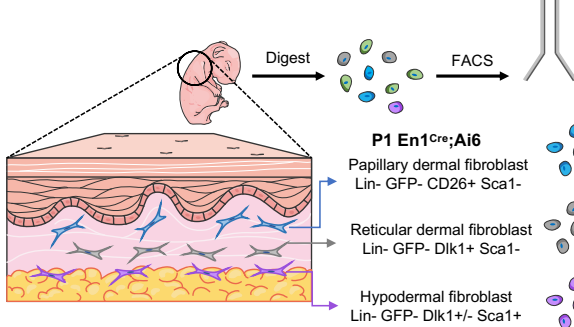**F**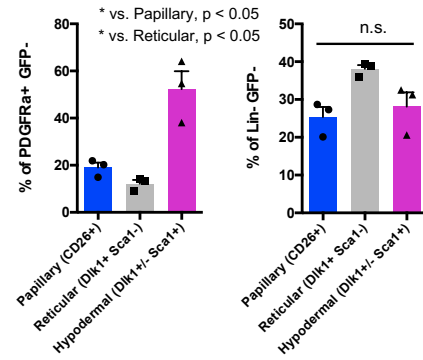**E**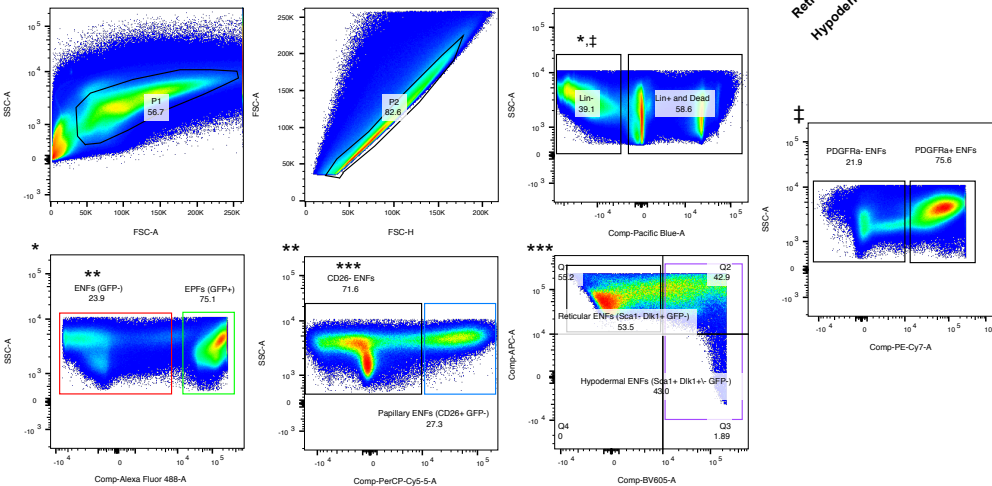

**Figure S2: FACS strategies to isolate fibroblast subtypes.** (A) Strategy for isolating ENFs ( $\text{Lin}^- \text{GFP}^- \text{CD26}^-$ ), eEPFs ( $\text{Lin}^- \text{GFP}^- \text{CD26}^+$ ), and pEPFs ( $\text{Lin}^- \text{GFP}^+$ ) from tamoxifen-induced *En-1<sup>Cre-ERT</sup>;Ai6* dorsal skin and excisional wounds. (B) Representative FACS plots for GFP- control (left), unwounded skin (right) and wounds (bottom). \*, \*\* indicate gated cell populations carried over into subsequent plots. (C) Quantification of relative proportion of fibroblasts ( $\text{Lin}^-$ ) represented by ENFs (red), eEPFs (blue), and pEPFs (green) in unwounded skin vs. healed wounds (POD 14). Points represent biological replicates; N = 3 biological replicates, each containing pooled cells from 4 mice (2 wounds/mouse). Unwounded vs. wounded: eEPFs, \* $P = 0.0559$ ; pEPFs, \* $P = 0.0204$ ; ENFs,  $P = 0.6433$ . (D) Schematic for FACS isolation of papillary, reticular, and hypodermal fibroblasts from *En-1<sup>Cre</sup>;Ai6* dorsal skin based on previously reported surface markers. (E) Representative FACS plots showing gating strategy for isolating ENFs ( $\text{Lin}^- \text{GFP}^-$ ; red box) and EPFs ( $\text{Lin}^- \text{GFP}^+$ ; green box), and fractionation of ENF subtypes (papillary, blue box; reticular, gray box; hypodermal, purple box). \*, \*\*, \*\*\*, and † indicate gated cell populations carried over into subsequent plots. (F) Proportion of fibroblasts represented by each ENF subpopulation (papillary, blue; reticular, gray; hypodermal, purple) when fibroblasts are defined as PDGFRa<sup>+</sup> cells (left panel) versus  $\text{Lin}^-$  cells (right panel). N = 3 separate experiments using pooled cells from individual litters. Left: papillary vs. hypodermal \* $P = 0.0135$ , reticular vs. hypodermal \* $P = 0.0067$ . Right: all pairwise comparisons  $P > 0.05$ .

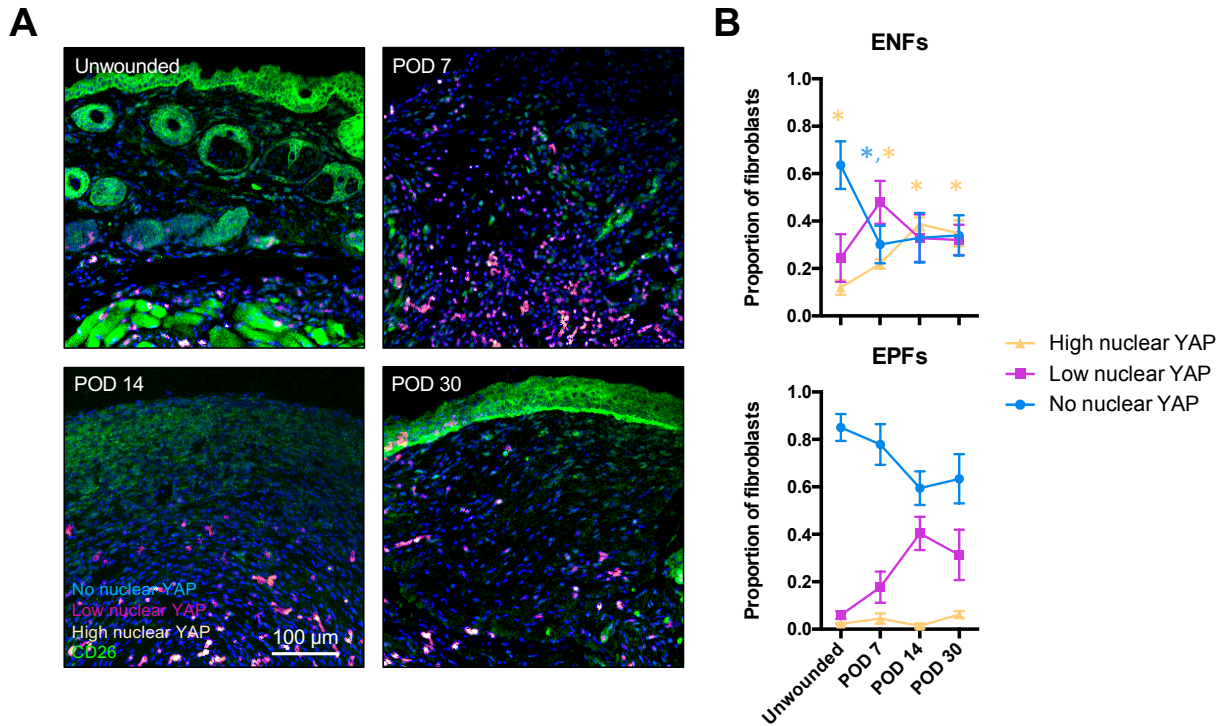

**Figure S3: Nuclear YAP localization in ENFs and EPFs. (A)** Immunofluorescent histology of excisional wounds at POD 0 (unwounded), 7, 14, and 30. Nuclear localization of YAP in ENFs ( $CD26^-$ ) and EPFs ( $CD26^+$ ) was measured using a custom image processing algorithm. **(B)** Quantification of ENFs and EPFs with no nuclear YAP, low nuclear YAP, and high nuclear YAP. Data points represent the average of at least 3 mice (2 wounds/mouse). ENFs vs EPFs with no nuclear YAP at POD 7,  $*P = 0.015$ . ENFs vs EPFs with high nuclear YAP at POD 0 ( $*P = 0.035$ ), 7 ( $*P = 0.0040$ ), 14 ( $*P = 0.00022$ ), and 30 ( $*P = 0.0022$ ).



**A**

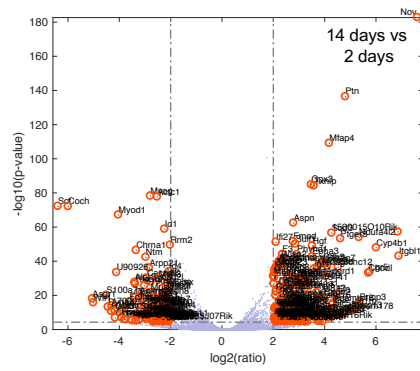

**B**

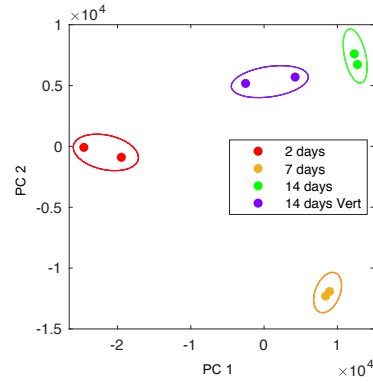

**C**

GO-BP::

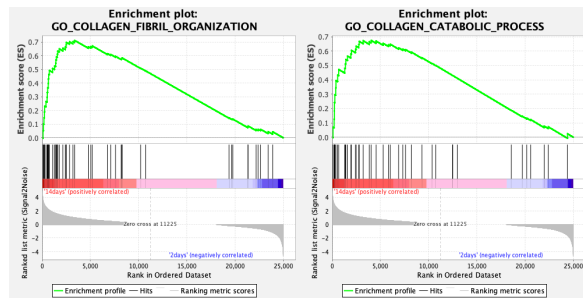

Hallmarks:

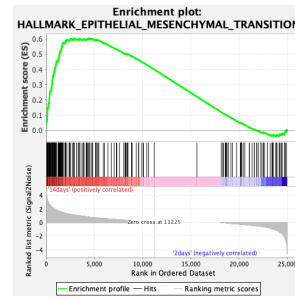

GO-MF:

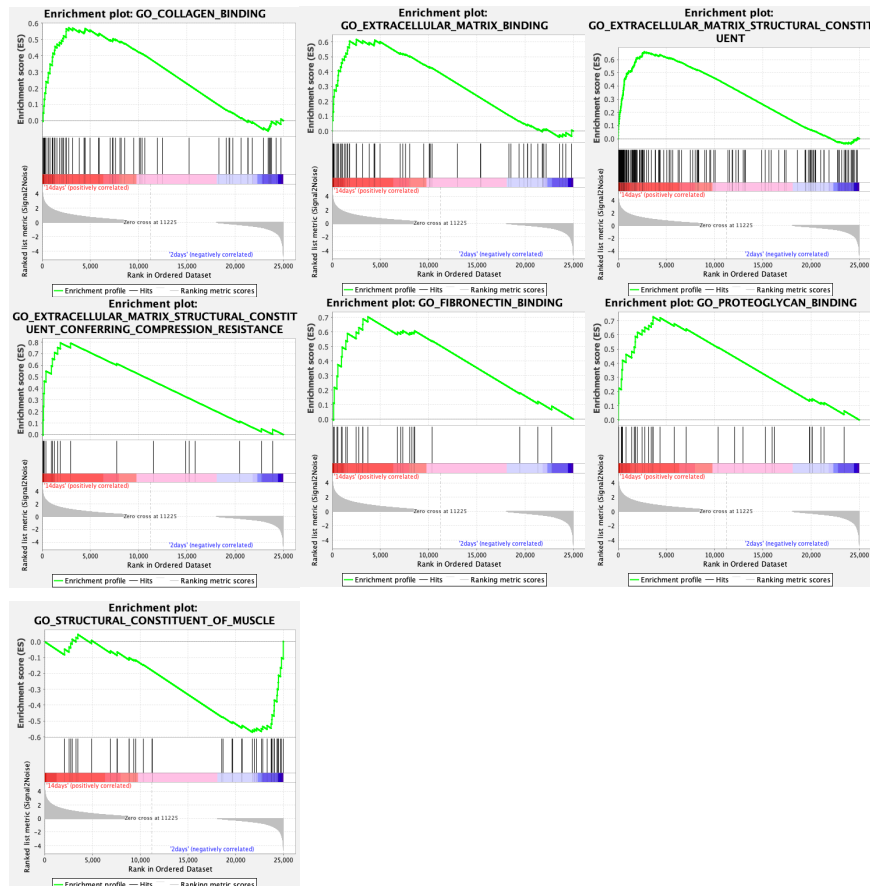

**Figure S4: Gene set enrichment analysis for *in vitro* ENFs and pEPFs.** (A) Volcano plot of 920 differentially expressed genes between ENFs cultured for 2 or 14 days on TCPS. (B) Principal component analysis (PCA) of RNA-seq data from cultured ENFs at different timepoints, with and without Verteporfin treatment. Clusters for each timepoint and condition are indicated by ovals. (C) Normalized RNA-seq counts for ENFs (mTomato<sup>+</sup>) cultured on TCPS for 2 days (remain as ENFs) or 14 days (activate *Engrailed-1*; GFP<sup>+</sup>) were analyzed for enrichment in the Gene Ontology Biological Process, Gene Ontology Molecular Function, and Hallmark databases. Activation of *Engrailed-1* was associated with the loss of “muscle development” identity and the gain of a pro-fibrotic identity, as inferred by enrichment for a variety of ECM-related terms at 14 days.



papillary (left), reticular (middle), and hypodermal (right) ENFs cultured on TCPS (Day 14 vs. Day 2/7).

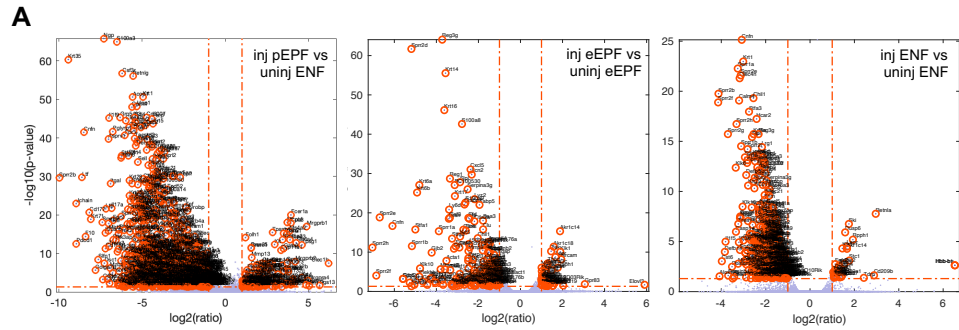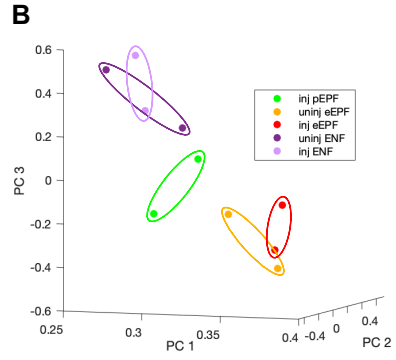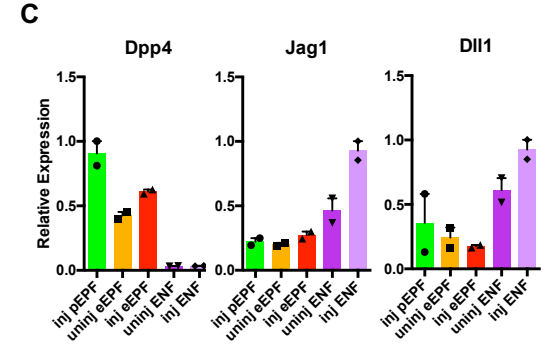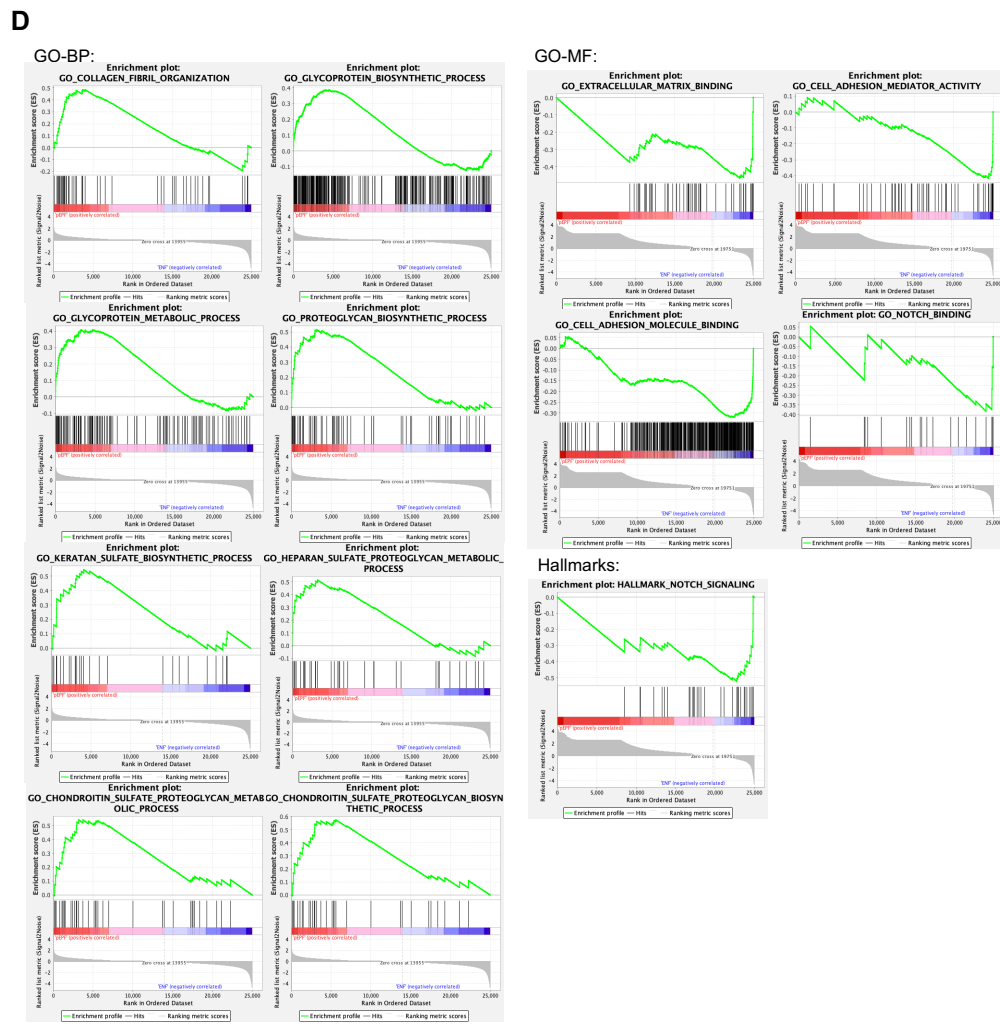

**Figure S6: Gene set enrichment analysis for *in vivo* ENFs and pEPFs.** (A) Volcano plot showing 1,138 genes significantly upregulated or downregulated in ENFs, eEPFs, or pEPFs in wounds (inj) compared to uninjured skin (uninj). Individual plots are labeled (top right corner) with comparisons shown in each plot. (B) PCA of RNA-seq data for pEPFs, eEPFs, and ENFs from injured and uninjured skin. (C) Comparison of Dpp4 (CD26; left panel), Jag1 (middle panel), and Dll1 (right panel) gene counts for each cell type. (D) Normalized RNA-seq counts for scar ENFs (GFP<sup>-</sup> CD26<sup>-</sup>) and postnatal EPFs (GFP<sup>+</sup>) were analyzed for enrichment in the Gene Ontology Biological Process, Gene Ontology Molecular Function, and Hallmark databases. Scar ENFs were enriched for ECM-adhesion and Notch signaling-related terms, supporting their mechanosensitive phenotype. In contrast, postnatal EPFs were enriched for a variety of ECM-related terms, confirming that activation of *Engrailed-1* in the wound environment by mechanosensitive ENFs was associated with the acquisition of a pro-fibrotic phenotype.

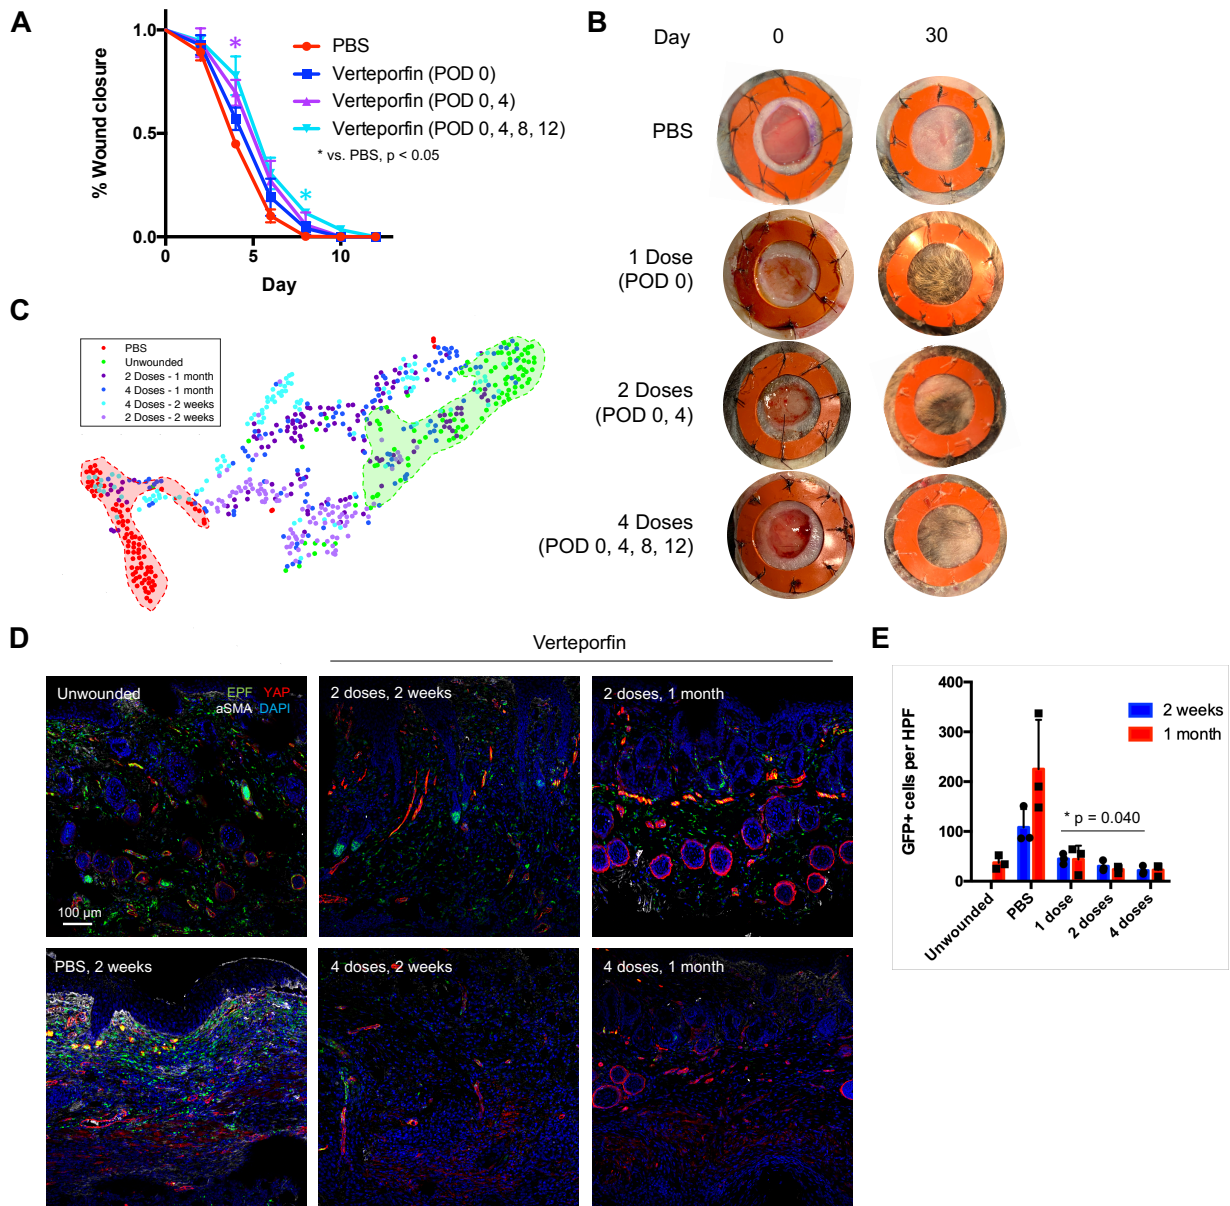

**Figure S7: Characterization of wounds treated with multiple doses of Verteporfin.** (A) Wound curve showing closure (re-epithelialization) rates for wounds treated with PBS (red) versus 1 (blue), 2 (purple), or 4 (light blue) doses of Verteporfin at indicated intervals.  $N =$  at least 6 wounds/condition. POD 4, 2 dose Verteporfin vs. PBS,  $*P = 0.0140$ ; POD 8, 4 dose Verteporfin vs. PBS,  $*P = 0.0140$ ; all other comparisons,  $P > 0.05$ . (B) Representative gross photographs of wounds treated with PBS (first row), 1 (second row), 2 (third row), or 4 (fourth row) doses of Verteporfin at POD 0 (left column) and 30 (right column). (C) t-SNE visualization of ECM ultrastructural properties for various treatment groups after 2 weeks or 1 month of healing (see legend). Clusters for unwounded skin and scar (PBS) highlighted by shaded regions. (D) Immunofluorescent histology for EPFs (GFP+), YAP+, and  $\alpha$ -SMA+ cells in unwounded skin and PBS- or Verteporfin-treated scars. (E) Quantification of GFP+ cells (EPFs) per 20x HPF.



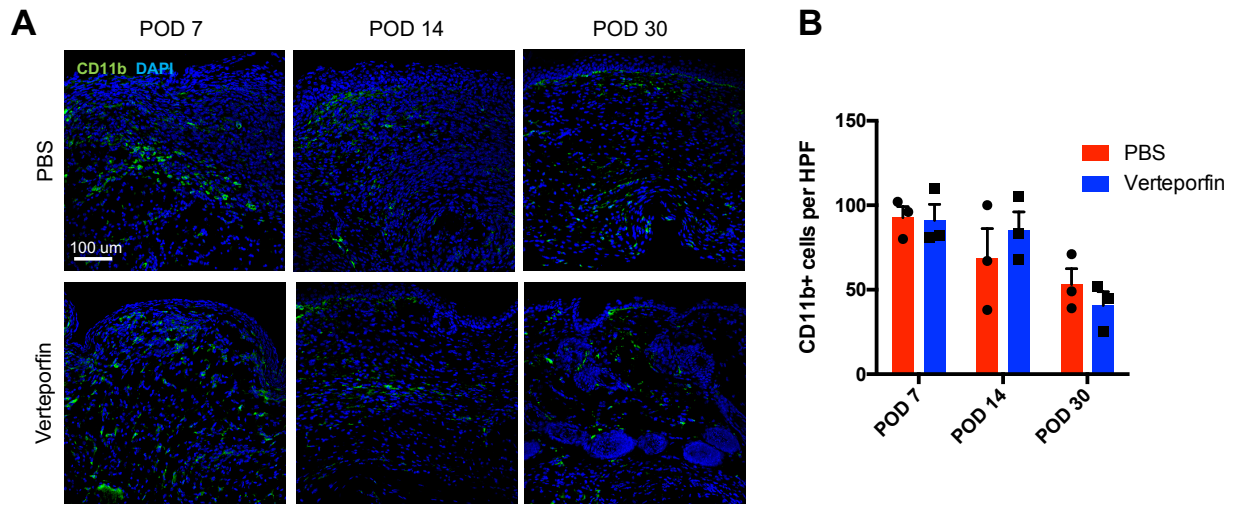

**Figure S8: Comparison of immune cell infiltration (A)** Immunofluorescent histology for CD11b<sup>+</sup> myeloid cells (macrophages, neutrophils) in PBS- and Verteporfin-treated wounds at POD 7, 14, and 30. **(B)** Quantification of CD11b<sup>+</sup> cells per 20x HPF (all comparisons n.s.).

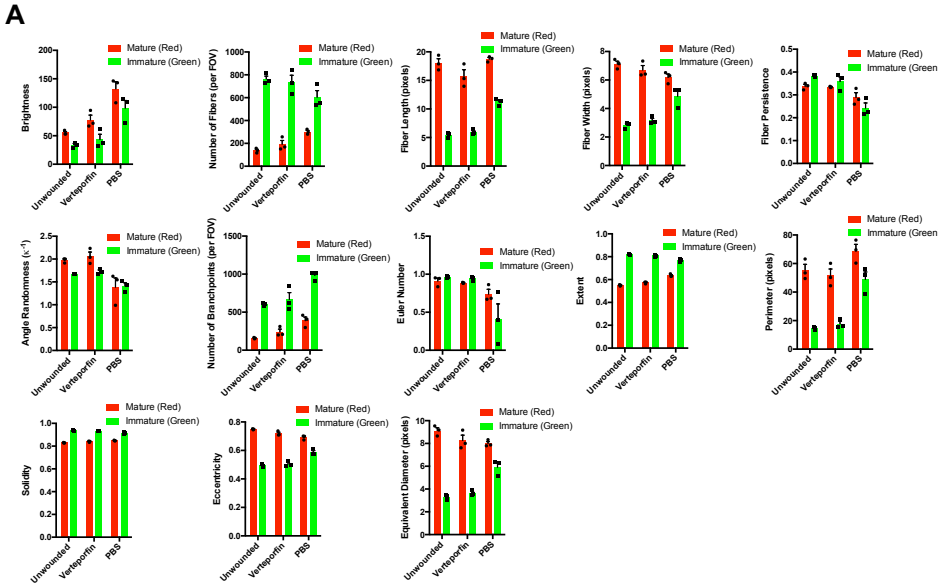

**B**

|                              | Unwounded vs. PBS | Unwounded vs. Verteporfin |
|------------------------------|-------------------|---------------------------|
| Brightness Red               | 0.02153639        | 0.1402572                 |
| Number of Fibers Red         | 0.00538111        | 0.3289987                 |
| Length Red                   | 0.4129471         | 0.3414797                 |
| Width Red                    | 0.1541445         | 0.4836084                 |
| Persistence Red              | 0.2225794         | 0.7726405                 |
| Angle Randomness Red         | 0.1120161         | 0.35783                   |
| Number of Branchpoints Red   | 0.04318765        | 0.1465099                 |
| Euler Number Red             | 0.2278618         | 0.614072                  |
| Extent Red                   | 0.00702982        | 0.1134568                 |
| Perimeter Red                | 0.2432686         | 0.7009157                 |
| Solidity Red                 | 0.01408811        | 0.1807911                 |
| Eccentricity Red             | 0.02441917        | 0.1122365                 |
| Equivalent Diameter Red      | 0.1147097         | 0.3550306                 |
| Brightness Green             | 0.05382544        | 0.4843854                 |
| Number of Fibers Green       | 0.04283562        | 0.6891531                 |
| Length Green                 | 0.00057345        | 0.2041019                 |
| Width Green                  | 0.02108803        | 0.1593481                 |
| Persistence Green            | 0.02048721        | 0.3818789                 |
| Angle Randomness Green       | 0.06779243        | 0.2906806                 |
| Number of Branchpoints Green | 0.01352199        | 0.5897527                 |
| Euler Number Green           | 0.1128322         | 0.5234231                 |
| Extent Green                 | 0.0207322         | 0.1770478                 |
| Perimeter Green              | 0.01688782        | 0.2103601                 |
| Solidity Green               | 0.05457558        | 0.4012164                 |
| Eccentricity Green           | 0.02372114        | 0.51771                   |
| Equivalent Diameter Green    | 0.00971158        | 0.1554854                 |

**Figure S9: Quantification of ECM fiber parameters at 2 weeks following wounding. (A)** Quantified fiber parameters from unwounded skin and Verteporfin- or PBS-treated wounds at POD 14. Separate values were calculated for mature (red) versus immature (green) fibers, as assessed by Picosirius staining. Dots represent the average of two wounds from each of N = 3 mice. **(B)** P-values for comparison of fiber parameters (red, mature; green, immature) between unwounded skin and either PBS- (left) or Verteporfin-treated wounds (right).

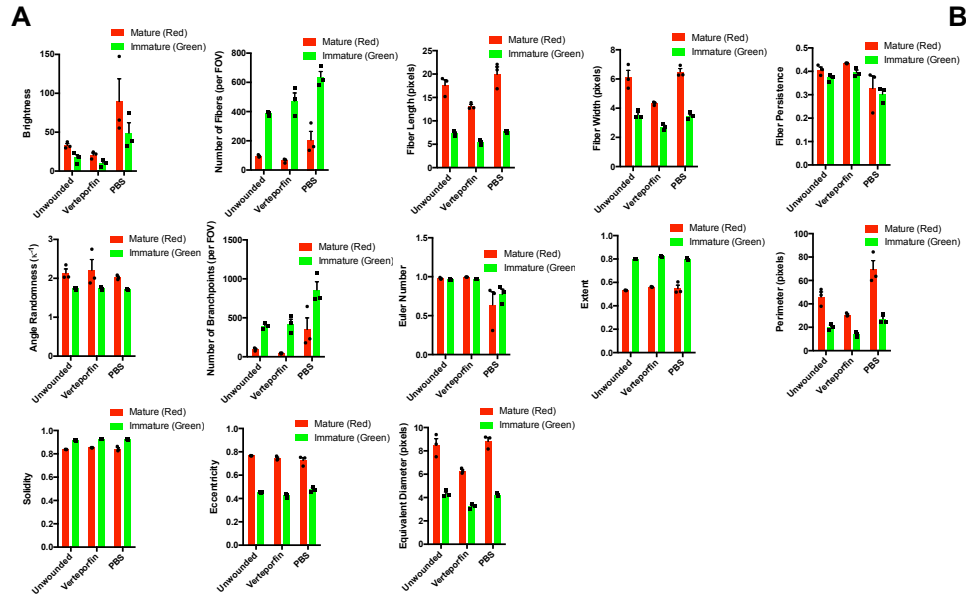

|                              | Unwounded vs. PBS | Unwounded vs. Verteporfin |
|------------------------------|-------------------|---------------------------|
| Brightness Red               | 0.2097743         | 0.1312494                 |
| Number of Fibers Red         | 0.2126086         | 0.1320496                 |
| Length Red                   | 0.02739428        | 0.05412324                |
| Width Red                    | 0.6187718         | 0.04964219                |
| Persistence Red              | 0.2938966         | 0.1565951                 |
| Angle Randomness Red         | 0.2462229         | 0.8373055                 |
| Number of Branchpoints Red   | 0.24889           | 0.07081044                |
| Euler Number Red             | 0.1890137         | 0.1330719                 |
| Extent Red                   | 0.6190985         | 0.00017416                |
| Perimeter Red                | 0.1796518         | 0.06297936                |
| Solidity Red                 | 0.7166296         | 0.00987068                |
| Eccentricity Red             | 0.2211311         | 0.1461072                 |
| Equivalent Diameter Red      | 0.3620837         | 0.04968594                |
| Brightness Green             | 0.2032939         | 0.4274585                 |
| Number of Fibers Green       | 0.03180603        | 0.3044375                 |
| Length Green                 | 0.3511433         | 0.0873357                 |
| Width Green                  | 0.7743711         | 0.07409608                |
| Persistence Green            | 0.1241506         | 0.3845503                 |
| Angle Randomness Green       | 0.1981639         | 0.8216653                 |
| Number of Branchpoints Green | 0.06770968        | 0.792688                  |
| Euler Number Green           | 0.1103502         | 0.6292602                 |
| Extent Green                 | 0.6286606         | 0.0065861                 |
| Perimeter Green              | 0.2029898         | 0.1276798                 |
| Solidity Green               | 0.1714856         | 0.02375743                |
| Eccentricity Green           | 0.1821141         | 0.07204964                |
| Equivalent Diameter Green    | 0.7296221         | 0.07308456                |

**Figure S10: Quantification of ECM fiber parameters at 1 month following wounding. (A)** Quantified fiber parameters from unwounded skin and Verteporfin- or PBS-treated wounds at POD 30. Separate values were calculated for mature (red) versus immature (green) fibers, as assessed by Picrosirius staining. Dots represent the average of two wounds from each of N = 3 mice. **(B)** P-values for comparison of fiber parameters (red, mature; green, immature) between unwounded skin and either PBS- (left) or Verteporfin-treated wounds (right).

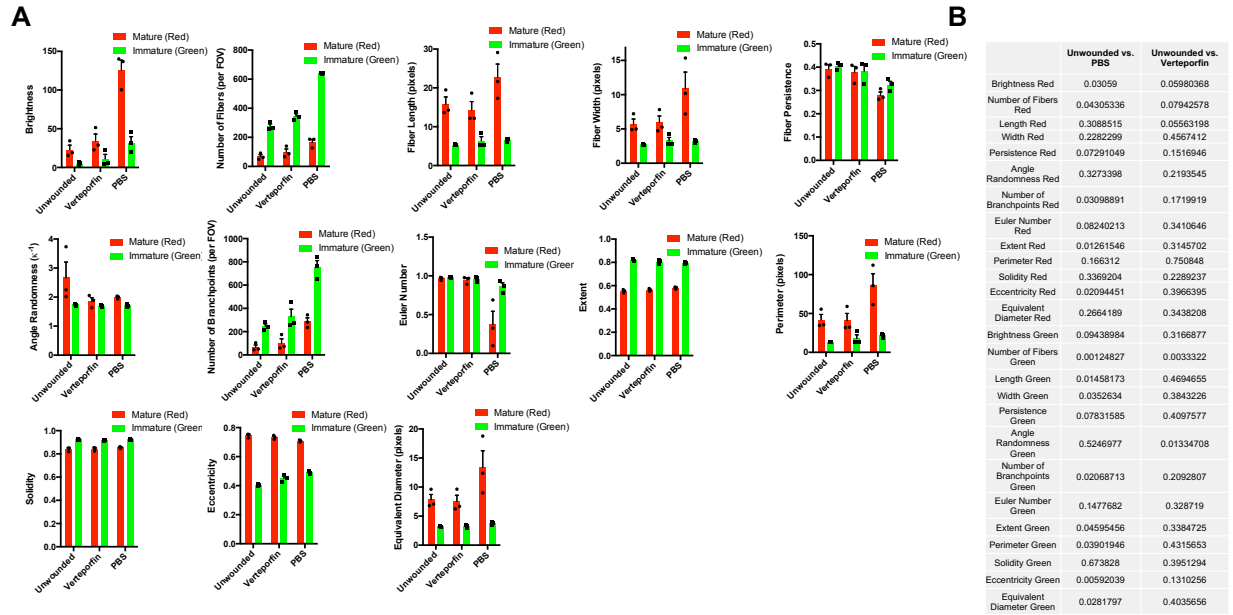

**Figure S11: Quantification of ECM fiber parameters at 3 months following wounding. (A)** Quantified fiber parameters from unwounded skin and Verteporfin- or PBS-treated wounds at POD 90. Separate values were calculated for mature (red) versus immature (green) fibers, as assessed by Picrosirius staining. Dots represent the average of two wounds from each of N = 3 mice. **(B)** P-values for comparison of fiber parameters (red, mature; green, immature) between unwounded skin and either PBS- (left) or Verteporfin-treated wounds (right).

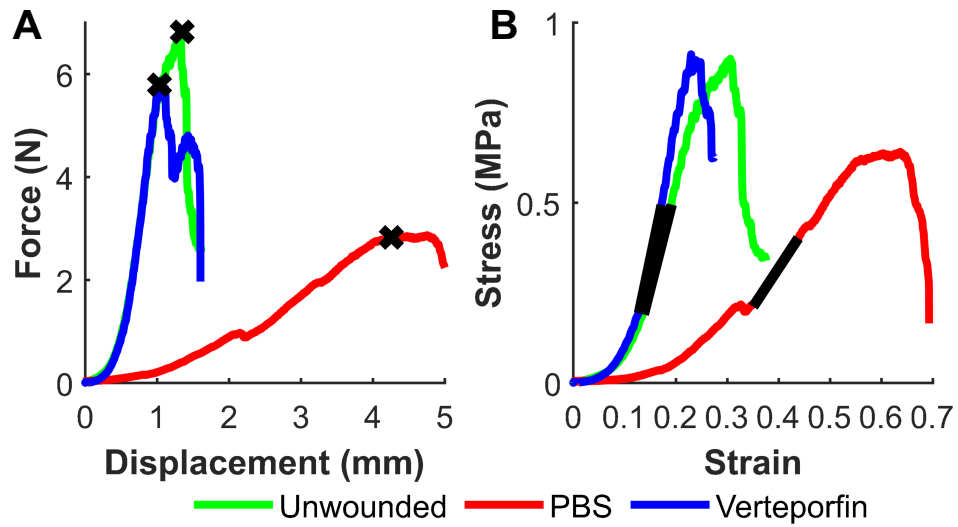

**Figure S12: Instron comparison of PBS- and Verteporfin-treated wounds after 1 month of healing (A)** Representative force-displacement curve for unwounded skin (green), PBS-treated wounds (red), and Verteporfin-treated wounds (blue) after 1 month of healing. **(B)** Representative stress-strain curve for the same groups as (A). Verteporfin treatment yielded wounds that more closely resembled unwounded skin than scar (PBS treatment) after 1 month of healing.

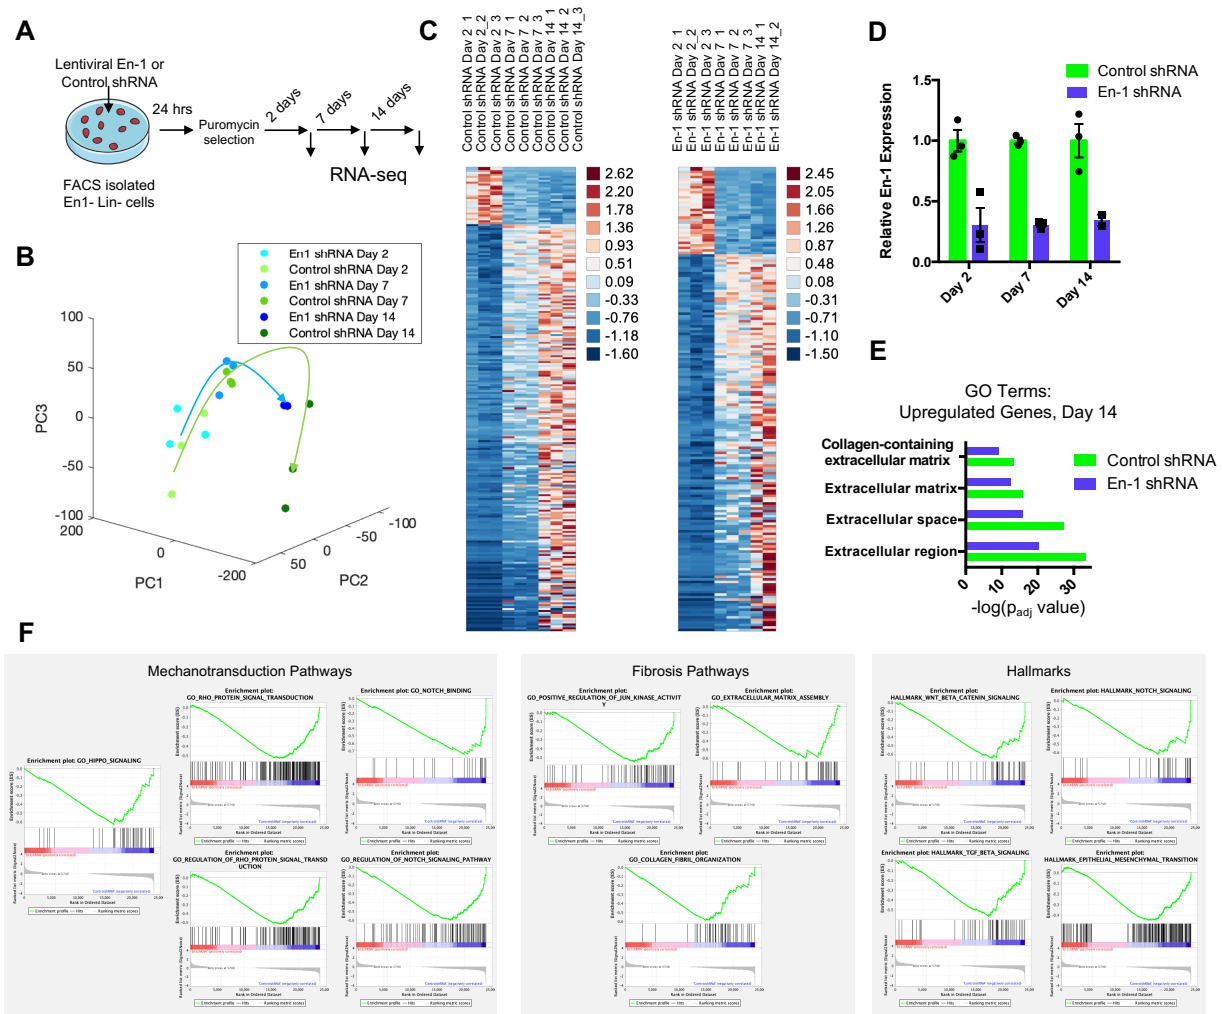

**Figure S13: Bulk RNA-seq analysis of *Engrailed-1* shRNA knockdown.** (A) Schematic detailing FACS-isolation, culture, and lentiviral shRNA-mediated knockdown of *En-1* expression in ENFs. (B) Principal components analysis of control- and *En-1*-shRNA treated ENFs cultured on TCPS for 2, 7, and 14 days. (C) Gene expression heatmaps for control- (left) and *En-1*-shRNA (right) ENFs. (D) Quantification of relative *En-1* transcription at Day 2, 7, and 14 of culture. N = 3 wells with pooled ENFs derived from separate litters. (E) GO term enrichments for significantly upregulated genes after 14 days of culture on TCPS. (F) Gene set enrichment analysis of differentially expressed genes in control- and *En-1*-shRNA treated ENFs after 14 days of culture.
